# Supplementary material for: Nanomaterial cytotoxicity is composition, size, and cell type dependent
Source: Springer Nature journal article supplement (doi:10.1186/1743-8977-7-22), 2010-08-21

**Control****a. 3T3**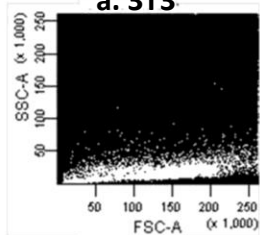**b. hT**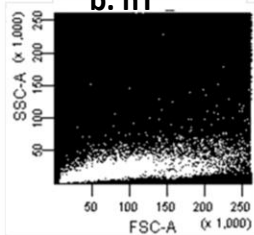**c. RAW**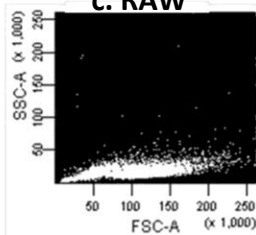**TiO<sub>2</sub>**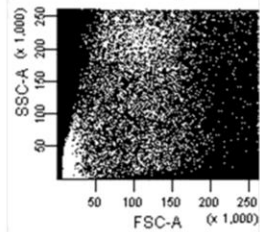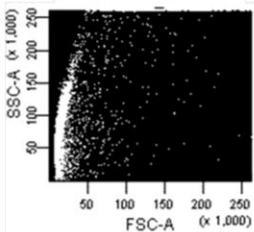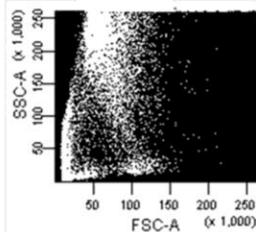**SiO<sub>2</sub>**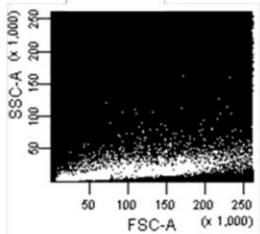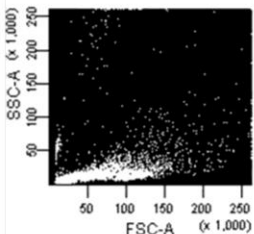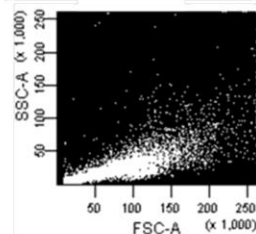**MWCNT <8**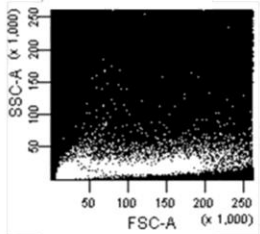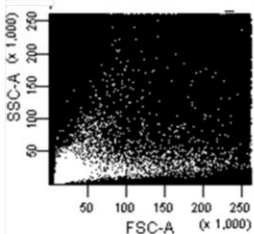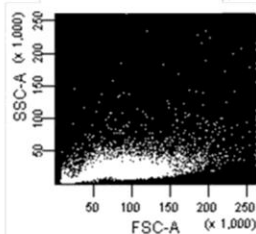**MWCNT 20-30**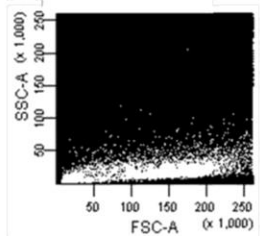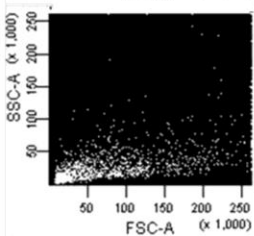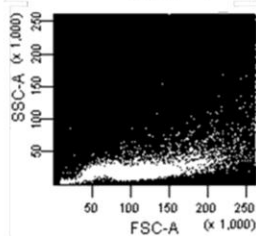**MWCNT >50**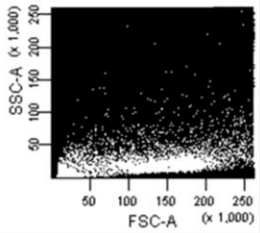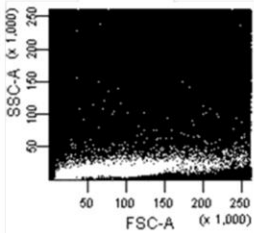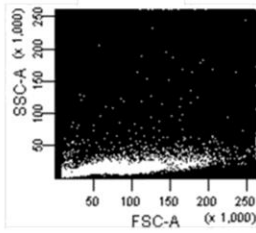

Supplement: 12989_2009_120_MOESM2_ESM.pdf [file 12989_2009_120_MOESM2_ESM.pdf]
