# Supplementary material for: Nanomaterial cytotoxicity is composition, size, and cell type dependent
Source: Springer Nature journal article supplement (doi:10.1186/1743-8977-7-22), 2010-08-21

**a.**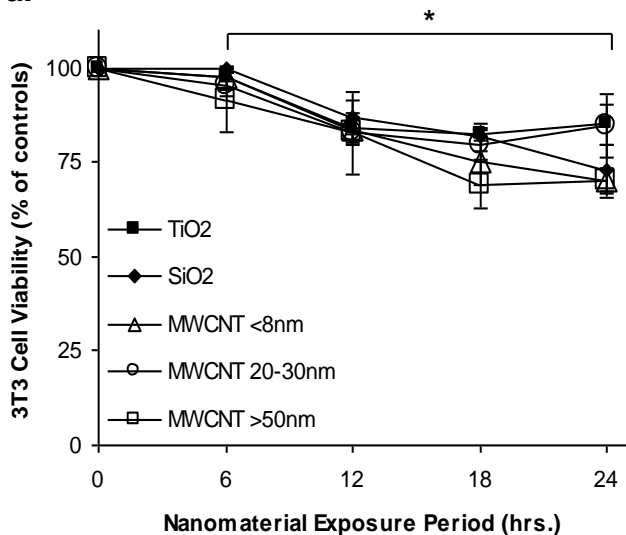**b.**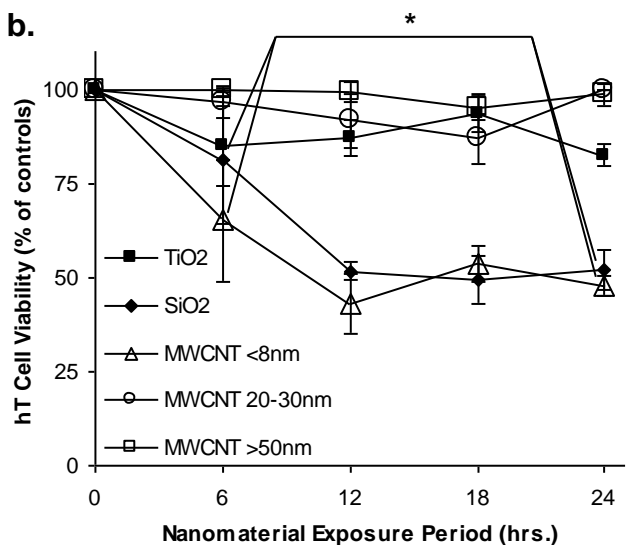**c.**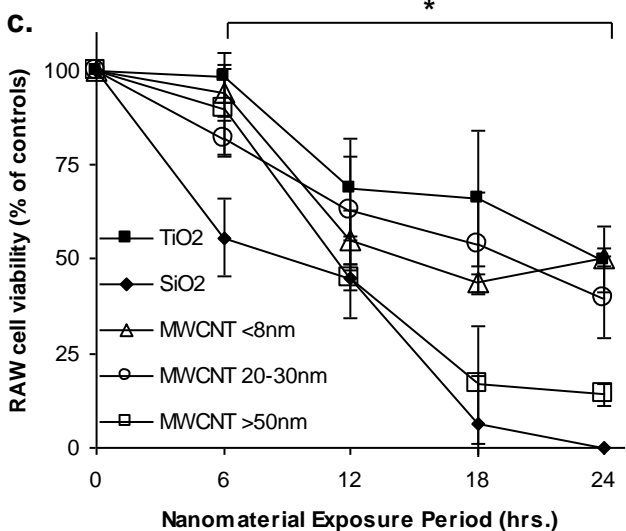

Supplement: 12989_2009_120_MOESM4_ESM.pdf [file 12989_2009_120_MOESM4_ESM.pdf]
